# Supplementary material
Source: HighWire-hosted journal article supplement (http://www.qdcxjkg.com/highwire/filestream/113615/field_highwire_adjunct_files/2/figures_legends.pdf)
Supplement: figures_legends.pdf [file figures_legends.pdf]

## **Figure e-1.**

### **Figure Title:**

Framingham Cardiac Risk Score according to OSA categories in patients without known type 2 diabetes.

### **Figure legend:**

**Figure e-1.** The Framingham Cardiac Risk Score (Wilson P.W. et al. *Circulation* 1998; 97(18): 1837-1847) was applied to estimate the 10-year risk of coronary events in the different AHI categories. ANOVA with Scheffe post-hoc analysis was used for comparisons between OSA categories. \* p-value <0.005.

## **Figure e-2.**

### **Title:**

**Prevalence of each component of metabolic syndrome according OSA status in the female group .**

### **Legend:**

**Figure e-2.** The presence of OSA was considered when  $AHI \geq 15$  events /hour. The metabolic syndrome definition and its components were based on NCEP ATPIII modified criteria (Circulation 2009; 120: 1640-1645). Chi-square test was used for comparisons.
